1 **Social communication between microbes colonizing the social honey bee *Apis mellifera***

2 K.I. Miller<sup>1</sup>, C.D. Franklin<sup>1</sup>, H. R. Mattila<sup>2</sup>, and I.L.G. Newton<sup>1</sup>

3 Department of Biology, Indiana University, Bloomington, Indiana, USA<sup>1</sup>

4 Department of Biological Sciences, Wellesley College, Wellesley, Massachusetts, USA<sup>2</sup>

5 **Abstract**

6 The European honey bee (*Apis mellifera*) is a charismatic species that plays a critical role in the  
7 pollination of agriculturally important crops and native flora. One emerging field of research is  
8 that of the host-associated honey bee microbiome: a group of bacterial phylotypes consistently  
9 found within the honey bee, which may play critical roles such as protection from pathogens and  
10 nutrient acquisition. In other model systems, host-associated microbial communities are known to  
11 participate in a form of bacterial communication known as quorum sensing. This type of  
12 communication allows bacteria to sense their environment and respond with changes in gene  
13 expression, controlling a number of factors including virulence, biofilm formation, and cell  
14 motility. Here, we have investigated the production of a specific quorum sensing molecule by  
15 honey bee microbes *in vivo* and *in vitro*. We specifically focused on the inter-species signaling  
16 molecule, autoinducer-2 (AI-2). We identified the production of AI-2 by both the entire  
17 community (using honey bee gut homogenates) and by cultured isolates, using a *Vibrio harveyi*  
18 biosensor. By comparing newly emerged and adult bees, we showed this signal is likely coming  
19 from the core microbial community. Finally, using honey bee specific bacterial isolates, we  
20 identified changes in biofilm production when isolates are exposed to increased levels of  
21 exogenous AI-2. Altogether, these data provide multiple lines of evidence for the presence of  
22 quorum sensing inside the honey bee host. The effect of AI-2 on biofilm formation by honey bee  
23 specific bacteria identifies one potential avenue for quorum sensing to affect host health.

24

## 25 **Author summary**

26 Microbial communities associate with every animal on the planet and can have dramatic effects  
27 on the health of their host. The honey bee is one such animal, home to a characteristic community  
28 of bacteria, which may provide various benefits. Here, we show that these microbes are producing  
29 quorum sensing molecules which could support interactions between bacterial members and  
30 facilitate host colonization.

## 31 **Introduction**

32 Host-associated microbial communities (the microbiota) can have dramatic effects on the health,  
33 fecundity, and longevity of many insect hosts. For example, germ free *Drosophila* are unable to  
34 survive the larval stage when in low nutrient environments and their survival can be restored with  
35 the addition of just one bacterial strain (1, 2). Additionally, alterations in the microbiome can affect  
36 traits as from mating behavior (3) to protection from pathogens (4, 5). These examples point to the  
37 critical and varied roles of the microbiota in insects. Insects are the most numerically and  
38 taxonomically abundant animal group on the planet and play important roles in disease ecology  
39 (6), herbivory (7), pollination (8), and other ecosystem processes (9, 10). It is therefore vital that  
40 we understand how insect associated microbes may shape insect health and subsequently or  
41 directly, impact their ecological roles.

42 The honey bee gut microflora is described as a consistent group of bacterial clades, dominated by  
43 Gamma-proteobacteria, Firmicutes, and Actinobacteria (11–14). Basic characterization of these  
44 microbial groups has led to speculations about their role in honey bee health and whether they are

45 responsible for provisioning nutrients (15) or assisting in the breakdown of plant-derived  
46 carbohydrates (16, 17), as is the case for other insect-associated microbes. Additionally, honey  
47 bees are more susceptible to pathogens after their microbiome is disrupted by antibiotics,  
48 supporting a protective role of the microbiota (5). Although we are just starting to understand the  
49 functions of these microbial species, we do know that they interact with each other *in vivo* (18)  
50 and *in vitro* (19). For example, *Gilliamella*, *Snodgrassella*, and *Lactobacillus* strains together form  
51 a biofilm on host tissue in the ileum of honey bees (18). When grown in co-culture, lactic acid  
52 bacteria found in the honey bee promote each other's growth, suggesting a mutualistic or  
53 syntrophic interaction (19). However, little is currently known about *how* the honey bee associated  
54 microbes interact with each other and how these interactions impact the host.

55 It is important to emphasize that bacterial species do not exist in isolation; although studied in  
56 monoculture in the laboratory, their natural ecology includes other microbial organisms. One way  
57 bacteria communicate in their natural ecology is through a process referred to as “quorum sensing”.  
58 Quorum sensing is broadly phylogenetically conserved, found in a variety of bacterial classes (20).  
59 This density-dependent communication allows bacteria to sense their environment and make  
60 population scale behavioral changes in response. Bacteria participating in quorum sensing produce  
61 signaling molecules, termed autoinducers, and the concentration of these molecules correlates with  
62 bacterial density. When a threshold is reached, autoinducers often elicit changes in gene expression  
63 which affect many processes including biofilm formation, symbiosis, motility, virulence and a  
64 number of others (21, 22). For example, the bobtail squid forms an intimate, mutualistic  
65 relationship with *Vibrio fischeri*, which produces bioluminescence at high densities, providing  
66 beneficial camouflage for the host (28). In contrast, quorum sensing from *Sodalis praecaptivus* in  
67 grain weevils suppresses virulence factors after establishment, allowing for persistent infection

68 (29). Additionally, *Vibrio cholerae* uses quorum sensing to mediate transmission by decreasing  
69 biofilm formation to increase dissemination (20, 23). These examples show the complexity of  
70 quorum sensing signals inside hosts and highlight the importance of understanding interactions in  
71 a host-specific manner.

72 Autoinducer-2 (AI-2) is a quorum sensing communication molecule that has received a lot of  
73 attention because of its effects on both gram-positive and negative bacteria. This molecule is  
74 predicted to be produced by 50% of all sequenced bacteria and detected by many more, controlling  
75 a broad array of behaviors including virulence, motility, nutrient acquisition, and biofilm formation  
76 (22). Because many bacteria produce, sense, and respond to AI-2 signals, quorum sensing via this  
77 molecule can result in community level effects. One example is the assembly of multispecies  
78 biofilms. In human oral cavities, *Streptococcus gordonii* and *Porphyromonas gingivalis* grow  
79 together to form a symbiotic, multispecies biofilm through the production and sensing of this  
80 interspecies signaling molecule. In the absence of AI-2, no biofilm is produced; however, biofilm  
81 production is restored if either species is able to produce AI-2 (24–26). Also, AI-2 production by  
82 gut microbiota may help to mitigate microbial community changes during antibiotic treatment.  
83 Mice with a microbiota that produced increased levels of AI-2 maintained a greater diversity of  
84 their bacterial gut microbiome after exposure to antibiotics (27). Taken together, these and other  
85 studies show that quorum sensing can cause changes in microbial gene expression, bacterial  
86 behavior, or community structure, which have resulting effects on host health.

87 In this study, we present the first analysis of quorum sensing by honey bee associated bacteria. We  
88 identified genes encoding the AI-2 producing enzyme (LuxS) in the genomes of both honey bee  
89 and bumble bee associated microbes and we predict that this gene is functional by identifying the  
90 important catalytic residues. We also provide evidence for the production of the AI-2 molecule

91 within the honey bee gut using a *Vibrio harveyi* biosensor and hypothesize that the hindgut of the  
92 honey bee may be a focal chamber for interspecies quorum sensing. We compared newly emerged  
93 bees with mature adult worker bees to show that the level of *luxS* expression by one honey bee gut  
94 community member (*Gilliamella*) increases as the bacterial community matures. We then used  
95 cultured representatives from the major groups associated with the honey bee and identified two  
96 clades (*Gilliamella* (Gamma-1), and *Bifidobacteria*) that produce AI-2 when cultured *in vitro*, as  
97 expected based on the genomic analysis of LuxS in these genera. Finally, we show that AI-2 can  
98 modify an important density-dependent behavior for honey bee host colonization: the formation  
99 of a biofilm.

100

## 101 **Methods**

### 102 *Bioinformatics analysis of luxS in existing genomic datasets*

103 The *luxS* loci were identified based on functional annotations in previously published  
104 metagenomic scaffolds (Engel et al. 2012; JGI IMG/M project ID 2498). Scaffolds containing  
105 these loci were downloaded from the JGI IMG/M and manually annotated and curated using the  
106 Artemis genome browser software (30). Percent identities (amino acid) between LuxS homologs  
107 found in the scaffolds were elucidated using National Center for Biotechnology Information's  
108 (NCBI) nucleotide Basic Local Alignment Search Tool (BLAST) suite. We found additional  
109 homologs of LuxS in honey bee specific *Gilliamella* and *Bifidobacterium* species through  
110 sequence homology with the type strains (accessions NZ\_CP007445.1 and NC\_018720.1  
111 respectively) using NCBI's BLAST. All amino acid sequences were downloaded from the NCBI  
112 and aligned using MUSCLE with default parameters (31). The alignment was converted to relaxed

113 phylip format and RAxML was used to generate the phylogeny (raxmlHPC-SSE3 -m  
114 PROTCATBLOSUM62) (32).

### 115 ***Isolation and culture of bacteria from honeybee guts***

116 Forager honey bees, identified by the presence of provisions in their pollen baskets, were collected  
117 via aspirator from colonies maintained at Indiana University – Bloomington. Entire digestive tracts  
118 were removed by dissection (the crop, midgut, and hindgut), whole guts were homogenized in  
119 sterile PBS, and a dilution series was plated on Brain-Heart Infusion (BHI) agar. Plates were grown  
120 anaerobically (via GasPak) at 37°C for 2 days. Isolated colonies were subcultured on BHI to obtain  
121 and maintain a pure culture. After 2 days of growth, DNA was extracted using the DNeasy Blood  
122 and Tissue kit (QIAGEN), the 16S rRNA was amplified with 27F/1492R primers and sequenced  
123 using the 27F primer. Sequences were trimmed for quality and cover > 400bp. Percent identities  
124 to known representative strains of honey bee gut microbes determined using NCBI's BLAST.

### 125 ***Phylogenetic analysis***

126 From these isolated and taxonomically characterized bacterial cultures, we chose a representative  
127 sample that phylogenetically clade with known honey bee specific phylotypes (following (12)).  
128 An alignment was generated using 16S rRNA gene sequences and the SINA aligner, which takes  
129 into account the 16S rRNA structure. This alignment was used as input to R (version 3.3.3) to  
130 create a phylogenetic tree using maximum likelihood with the *ape* and *phangorn* packages.  
131 Bootstrap values were generated from 1000 replications.

### 132 ***Detection of AI-2 via *Vibrio harvei* reporter***

133 The assay to detect AI-2 production was performed as previously described using a *Vibrio harveyi*  
134 reporter strain (34). The *Vibrio harveyi* TL26 reporter strain ( $\Delta luxN \Delta luxS \Delta cqsS$ ; (35)) was used  
135 in combination with a positive control: *V. harveyi* BB120 (Wild type). *Vibrio* cultures were grown  
136 in autoinducer bioassay (AB) medium aerobically at 30°C overnight. Entire digestive tracts were  
137 removed from foragers by dissection and were homogenized in sterile PBS either by section or the  
138 entire tract. Honey bee bacterial isolates were grown anaerobically in BHI broth at 37°C for two  
139 days. For use in the assay, an overnight culture of TL26 strain was diluted to 1:1000 and 1:5000.  
140 Isolates and gut homogenates were tested in triplicate by adding the undiluted, cell free supernatant  
141 of each isolate to the 1:5000 dilution of TL26. The positive control contained the cell-free  
142 supernatant of BB120 and the 1:5000 dilution of TL26. Cell free supernatant were obtained by  
143 centrifuging one mL of culture for five minutes at 14K g. Negative controls contained sterile BHI  
144 media and the 1:1000 dilution of TL26. Cell controls contained sterile H<sub>2</sub>O and the 1:1000 dilution  
145 of TL26. The plate was incubated at 30°C shaking aerobically for 8 hours. After incubation,  
146 luminescence and OD600 were measured on a Synergy H1 plate reader (BioTek Systems). Final  
147 luminescence values of the isolates are normalized to the final OD600 of the isolate.

#### 148 ***Detection of Gilliamella apicola LuxS Expression using quantitative RT-PCR analysis***

149 Whole gut sections of newly emerged honey bees as well as adult bees (aged 3-12 days) were  
150 collected from established, healthy hives located at Wellesley College in Wellesley,  
151 Massachusetts. RNA was extracted using TRIzol reagent and quantitative RT-PCR analyses were  
152 performed using SensiFAST™ SYBER Hi-ROX One-Step (Bioline) with primers specific to  
153 Gamma-1 LuxS gene (Forward: TTGTATGCCAACACTGTCCTTT, Reverse:  
154 TGGCGCGATGATCTTAATTT) and the host actin gene (Forward:  
155 ATAGCCAAAACCATGGCAAC, Reverse: TAAAAACCAGTTCGGCAACC, (36)) using the

156 Applied Bioscience StepOnePlus qRT-PCR machine (Life Technologies). Specificity was  
157 determined by Sanger sequencing of the amplified product and using NCBI's BLAST to identify.  
158 The expression levels were normalized to the host actin gene using the  $\Delta$ Ct Method.

### 159 *Amplicon sequencing of the bacterial community in newly emerged and adult bees*

160 Using the same samples above, RNA was extracted from the homogenates using TRIzol reagent  
161 (Ambion). RNA was DNase treated (DNA I, New England Biolabs) and cDNA was synthesized  
162 using the SuperScript III First-Strand synthesis system (Invitrogen). cDNA from each sample was  
163 amplified via PCR using Earth Microbiome barcoded primers 515F and 806R (37). Earth  
164 Microbiome amplification protocols were followed, except for the polymerase used (HF Phusion,  
165 New England Biolabs) and amplicons were cleaned with a PCR cleanup kit (Qiagen). Picogreen  
166 protocol was used to quantify DNA concentration for each pool sample. Samples were then  
167 normalized and pooled collectively for sequencing. Sequencing was performed on an Illumina  
168 Miseq, using 250 PE cycles. Sequences are available to reviewers upon request and are currently  
169 being deposited at the DDBJ.

### 170 *Sequence Analysis*

171 All sequence processing was performed using the Mothur microbial ecology suite (38). Reads from  
172 each sample were combined into contiguous sequences and screened for quality (maxambig 0,  
173 maxlength 300). Sequences were then aligned with the Silva reference database  
174 (silva.bacteria.fasta), preclustered, and examined for chimeras via the uchime function. After  
175 removal of chimeric sequences, sequences were taxonomically classified using a honey bee  
176 specific training set as a reference (39) and binned into operational taxonomic units (OTUs) based



177 upon 97% sequence identity. The data set was also subsampled to the smallest sample size of 1230  
178 sequences, in order to normalize across samples.

### 179 ***Biofilm production response to AI-2***

180 To determine if autoinducers (AI) have an effect on biofilm formation we modified a common  
181 biofilm assay (40). Using the same isolates used for the AI-2 assays, cultures in early exponential  
182 phase were added to a 24-well culture plate (Falcon). For the exogenous autoinducer treatment, a  
183 final concentration of 10  $\mu$ M of AI-2 was added (OMM Scientific). Sterile media was used for the  
184 negative control. After a 24-hour aerobic incubation at 37°C, crystal violet was added to stain the  
185 biofilm. The biofilm was then disrupted with acetic acid and the amount of stain was quantified  
186 using absorbance at 600 nm on a Synergy H1 plate reader (BioTek Systems).

187

## 188 **Results**

### 189 ***LuxS gene found in honey bee specific bacterial genomes***

190 LuxS is required for the enzymatic synthesis of the AI-2 signaling molecule. This metalloenzyme,  
191 S-Ribosylhomocysteinase, cleaves thioether bonds in S-ribosylhomocysteine resulting in a  
192 homocysteine and 4,5-dihydroxy-2,3-pentanedione (DPD) which is the precursor for AI-2. DPD  
193 can then spontaneously cyclize to form a furone known as AI-2. These reactions are catalyzed by  
194 a divalent metal ion, Fe<sup>2+</sup>, and the activity requires three conserved residues (His-54, His-58, and  
195 Cys-126) (21, 41–43).

196 Using functional annotation of metagenomics scaffolds, the *luxS* gene was identified in the  
197 genomes of two honey bee specific microbes (*Gilliamella apicola* and *Bifidobacterium sp.*) (Figure

198 1A). To determine how conserved this locus was within these bacterial species, we performed a  
199 search for homologs, using NCBI's BLAST, and were able to identify a *luxS* homolog in 91  
200 *Bifidobacterium* species, including both honey bee and bumble bee associated strains  
201 (*Bifidobacterium asteroides* and *bombi*). Similarly, we found *luxS* within 41 *Orbus*-related species,  
202 colonizing both honey bees and bumble bees (including *Frischella perrara*, *Gilliamella apicola*,  
203 and *Schmidhempelia bombi*, Figure 1. Finally, alignment of the LuxS protein sequences identified  
204 the conserved domains and residues known to be important for LuxS activity (Figure 1C). Highly  
205 conserved regions included the catalytic active residue (the cysteine at position 87, arrowhead in  
206 Figure 1C) and known metal co-factor binding sites (Asterisks in Figure 1C). This analysis  
207 suggested that these LuxS proteins might be both conserved within two important honey bee gut  
208 symbiont groups (the *Bifidobacteria* and *gamma-proteobacteria*), and potentially functional.

#### 209 ***Detection of AI-2 production honey bee microbiota***

210 One approach to determine whether LuxS is functional in the honey bee gut symbionts is to identify  
211 the production of autoinducer-2 (AI-2). Towards that end, we used a biological reporter assay,  
212 where a strain of *Vibrio harveyi* (TL26), which is incapable of producing autoinducers and  
213 responds to exogenous AI-2 only, was cultured in the presence of honey bee gut extracts. When  
214 TL26 senses AI-2, it responds with the production of light, which we detected using a  
215 spectrophotometer (see methods for more detail). We were able to detect significant AI-2  
216 production in entire digestive tracts of honey bee workers as well as gut sections (fore, mid, and  
217 hindgut) (Figure 2). These data suggest that AI-2 is being produced within honey bee gut digestive  
218 tract.

#### 219 ***Gilliamella strains express luxS in mature adult bees***

220 Because our assay above included honey bee tissue, we sought to confirm that the AI-2 signal we  
221 observed was coming from the bacterial community members. We therefore marked, age matched,  
222 and collected newly emerged bees (< 1 day old) and mature adult worker bees (> 3 days old). After  
223 extracting RNA from these samples, we used qRT-PCR and a *Gilliamella*-specific *luxS* primer set  
224 to quantify the expression of the *luxS* gene relative to host actin. In addition, we also characterized  
225 the microbial community associated with these same samples to confirm the establishment of  
226 *Gilliamella* in the mature adult worker bees. Previous work suggests that newly emerged bees lack  
227 the characteristic gut microbiome found in adult worker bees (18) and we confirmed that our newly  
228 emerged bee samples also lacked the core community and instead were dominated by unclassified  
229 OTUs (Figure 3). In contrast, mature adult bees were colonized by the characteristic core  
230 community (Figure 3). Additionally, *luxS* expression by *Gilliamella* was not detected in newly  
231 emerged bees while we identified low, but consistent expression in mature adult bees (relative  
232 expression compared to host actin was  $4.40E-05 \pm 1.35E-05$  SE; Figure 3).

### 233 ***Gilliamella* and *Bifidobacteria* species produce AI-2 in vitro**

234 Our results using gut extracts suggested that the honey bee gut community members may be  
235 producing AI-2 *in vivo*. To support our qRT-PCR results and the bioinformatics analysis of the  
236 *luxS* locus, we cultured *Gilliamella* and *Bifidobacteria* species from the honey bee gut and  
237 subjected their supernatants to the *Vibrio harveyi* AI-2 reporter assay. Representative isolates from  
238 the prominent clades found in the honey bee were chosen for the assay based on their phylogenetic  
239 placement (based on 16S rRNA gene sequence; Figure 4A). Each chosen isolate formed a highly  
240 supported clade (100% confidence) with known, characterized honey bee microbiome members  
241 (Figure 4A). In addition, 16S rRNA sequences from the cultured isolates were 92% - 100%  
242 identical to known honey bee associated microbes (Figure 4B). After normalizing to the optical

243 density of the cultures, we were able to detect AI-2 production by strains from each of these genera  
244 (as inferred from the luminescence produced by TL26) (Figure 4C). Compared to the negative  
245 controls, we observed statistically significant luminescence by TL26 in the presence of  
246 supernatants from *Bifidobacteria* and *Gilliamella* species (Figure 4C).

### 247 ***Biofilm production is modulated by honey bee bacterial isolates in response to autoinducers***

248 Previous work had identified the presence of a microbial biofilm in the honey bee digestive tract.  
249 Because biofilm production is known to be regulated by quorum sensing, we sought to identify a  
250 relevant and functional link between the production of AI-2 in the honey bee and host colonization.  
251 With the same representative isolates used above, we cultured these microbes with or without  
252 exogenously added AI-2. We identified a statistically significant increase in biofilm production  
253 with added AI-2 for all our four isolates from the *Gilliamella* genus (Figure 5). However, there  
254 were no significant changes in the biofilm production of the *Bifidobacteria* isolates in response to  
255 the addition of AI-2 (Figure 5).

## 256 **Discussion**

257 Bacterial infections of eukaryotic hosts are established and maintained using a variety of bacterial  
258 behaviors such as biofilm formation, motility, and virulence. These behaviors are often modulated  
259 and controlled in a density dependent fashion using signaling molecules (44). Here we present  
260 multiple lines of evidence to support bacterial autoinducer-2 based quorum sensing in the honey  
261 bee microbiota. We identified an open reading frame, annotated as encoding LuxS, the AI-2  
262 producing enzyme, in honey bee specific isolates. We detected the production of AI-2 *in vivo* using  
263 whole bee gut extracts. Additionally, we showed that *luxS* expression by *Gilliamella* is only  
264 detected in adult bees that harbor the core bacterial community. Finally, we also demonstrated that

265 specific isolates, representative of the honey bee core microbiome, produce AI-2 and increase  
266 biofilm formation in response to AI-2. These data support our conclusion that honey bee associated  
267 bacteria produce AI-2 during colonization of the host.

268 The two genera we worked with here (*Bifidobacteria* and *Gilliamella*) have been implicated in  
269 honey bee health or nutrition. For example, lactic acid bacteria (*Bifidobacteria*) isolated from the  
270 honey bee crop have been shown to protect larvae from pathogens such as European Foulbrood,  
271 likely through the production of antimicrobial molecules (45, 46). Members from the *Gilliamella*  
272 likely contribute to degradation of plant carbohydrates as they degrade pectin *in vitro* (15).  
273 Therefore, our work identifies a potential mechanism by which functionally important members  
274 of the honey bee microbiota may communicate with each other during their host association and  
275 suggests that AI-2 may regulate density dependent behaviors, such as biofilm formation, in the  
276 honey bee microbiota. In fact, *Gilliamella* species are known to form a multispecies biofilms in  
277 the honey bee digestive tract (18). For example, the ileum is colonized by both Gamma- and Beta-  
278 proteobacteria and the rectum is dominated by Firmicutes and Gamma-proteobacteria (18). These  
279 stratified biofilms suggest that colonization dynamics or environmental gradients may play a role  
280 in the colonization of the host. While important for the establishment and persistence of the  
281 microbiota, biofilms may also facilitate the breakdown of plant materials in host digestion. Based  
282 on our data, we propose that the production of autoinducers may mediate the colonization of honey  
283 bee specific microbes, contributing to the stratified biofilm observed. While some *Bifidobacterium*  
284 isolates were able to form a biofilm, the production of which was unaffected by exogenous AI-2,  
285 all *Gilliamella* strains increased their biofilm production in the presence of added AI-2. We  
286 therefore hypothesize that species such as *Bifidobacterium* may colonize early and that production

287 of AI-2 by these early colonizers may allow other species to form biofilms at higher density. This  
288 hypothesis awaits further testing.

289 The presence of *luxS* in *Frischella* as well as isolates from *Bombus* species suggests that social  
290 behaviors in these microbes, such as the production of AI-2, may be conserved across bee  
291 associated microbes, both pathogens and mutualists. The production of AI-2 and quorum sensing  
292 *writ large* is not uniformly beneficial to a host, as virulence is another density dependent behavior  
293 often regulated by quorum sensing. For example, in the cabbage white butterfly (CWB), quorum  
294 sensing in pathogenic *Pseudomonas aeruginosa* contributes to virulence such that, when quorum  
295 sensing pathways are disrupted, CWB larval survival rates are increased (49). Similarly in  
296 mammals, *Pseudomonas aeruginosa* utilizes quorum sensing during chronic lung infections,  
297 upregulating biofilm formation and adhesion (50, 51). Importantly, we identified a *luxS* in  
298 *Frischella perrara*, a putative bee pathogen, and in this organism, AI-2 may be utilized to promote  
299 pathogenicity within the honey bee host (52).

300 To our knowledge, this is the first time quorum sensing has been shown to occur in the honey bee  
301 microbiota. Investigations such as this one can help to identify not only behaviors mediated by  
302 quorum sensing but potential cross-talk and communication *between* microbial members in the  
303 gut. For example, although we focused on a single quorum sensing molecule (AI-2), there are  
304 likely many other molecules (such as AHLs and oligopeptides) produced *in vivo* by honey bee gut  
305 microbes. To form a complete picture of microbial communication between community members,  
306 additional quorum sensing molecules need be examined as well as their effects on gene regulation.  
307 We know that the honey bee bacterial community is specific and consistent (in terms of the  
308 presence of members), however the proportion of different bacteria within individual bees can vary  
309 (16, 19). If these bacterial members are participating in intra-species communication and

310 mediating important behaviors, their relative proportions may impact other community members  
311 and potentially host health. Future work is needed to understand how these persistent infections  
312 are maintained and influenced by quorum sensing.

### 313 **Acknowledgements**

314 We thank Dr. Julia van Kessel for generous gifts of *Vibrio harveyi* biosensor strains and  
315 synthesized AI-2. We thank Newton lab members Delaney Miller and Eric Smith for feedback in  
316 initial stages of writing this manuscript. This project was funded, in part, by crowd sourcing  
317 through experiment.com. ILGN was supported by generous startup funds from Indiana University  
318 and KIM was supported by the Floyd Microbiology Fellowship.

319 **References**

- 320 1. Lee W-J, Brey PT. 2013. How Microbiomes Influence Metazoan Development: Insights  
321 from History and Drosophila Modeling of Gut-Microbe Interactions. *Annu Rev Cell Dev*  
322 *Biol* 29:571–592.
- 323 2. Shin SC, Kim S-H, You H, Kim B, Kim AC, Lee K-A, Yoon J-H, Ryu J-H, Lee W-J.  
324 2011. Drosophila Microbiome Modulates Host Developmental and Metabolic  
325 Homeostasis via Insulin Signaling. *Science* (80- ) 334:670–4.
- 326 3. Sharon G, Segal D, Ringo JM, Hefetz A, Zilber-Rosenberg I, Rosenberg E. 2010.  
327 Commensal bacteria play a role in mating preference of *Drosophila melanogaster*. *Proc*  
328 *Natl Acad Sci* 107:20051–20056.
- 329 4. Weiss B, Aksoy S. 2011. Microbiome influences on insect host vector competence.  
330 *Trends Parasitol* 27:514–522.
- 331 5. Raymann K, Shaffer Z, Moran NA. 2017. Antibiotic exposure perturbs the gut microbiota  
332 and elevates mortality in honeybees. *PLoS Biol* 15:1–22.
- 333 6. Jones RT, Knight R, Martin AP. 2010. Bacterial communities of disease vectors sampled  
334 across time, space, and species. *ISME J* 4:223–231.
- 335 7. Rosenthal GA, Berenbaum MR. 1992. *Herbivores: Their Interactions with Secondary*  
336 *Plant Metabolites, Second Edition: Ecological and Evolutionary Processes*. Academic  
337 Press.
- 338 8. Klein A-M, Vaissiere BE, Cane JH, Steffan-Dewenter I, Cunningham SA, Kremen C,  
339 Tschardt T. 2007. Importance of pollinators in changing landscapes for world crops.



- 340 Proc R Soc B Biol Sci 274:303–313.
- 341 9. Jonsson M, Malmqvist B. 2003. Mechanisms behind positive diversity effects on  
342 ecosystem functioning: testing the facilitation and interference hypotheses. *Oecologia*  
343 134:554–559.
- 344 10. Jones CG, Lawton JH, Shachak M. 1994. Organisms as Ecosystem Engineers Organisms  
345 as ecosystem engineers. *Oikos* 69:373–386.
- 346 11. Mattila HR, Rios D, Walker-Sperling VE, Roeselers G, Newton ILG, V.E. W-S, Roeselers  
347 G, Newton ILG. 2012. Characterization of the Active Microbiotas Associated with Honey  
348 Bees Reveals Healthier and Broader Communities when Colonies are Genetically Diverse.  
349 *PLoS One* 7:e32962.
- 350 12. Newton ILG, Roeselers G. 2012. The effect of training set on the classification of honey  
351 bee gut microbiota using the Naive Bayesian Classifier. *BMC Microbiol* 12:221.
- 352 13. Moran NA, Hansen AK, Powell E, Sabree ZL. 2012. Distinctive gut microbiota of honey  
353 bees assessed using deep sampling from individual worker bees. *PLoS One* 7:e36393.
- 354 14. Martinson VG, Danforth BN, Minckley RL, Rueppell O, Tingek S, Moran NA. 2011. A  
355 simple and distinctive microbiota associated with honey bees and bumble bees. *Mol Ecol*  
356 20:619–628.
- 357 15. Engel P, Martinson VG, Moran NA. 2012. Functional diversity within the simple gut  
358 microbiota of the honey bee. *PNAS* [www.pnas.o](http://www.pnas.o).
- 359 16. Lee FJ, Rusch DB, Stewart FJ, Mattila HR, Newton ILG. 2015. Saccharide breakdown  
360 and fermentation by the honey bee gut microbiome. *Environ Microbiol* 17:796–815.

- 361 17. Kesnerova L, Mars RAT, Ellegaard KM, Troilo M, Sauer U, Engel P. 2017. Disentangling  
362 metabolic functions of bacteria in the honey bee gut. doi.org.
- 363 18. Martinson VG, Moy J, Moran N a. 2012. Establishment of characteristic gut bacteria  
364 during development of the honeybee worker. *Appl Environ Microbiol* 78:2830–2840.
- 365 19. Rokop ZP, Horton MA, Newton ILG. 2015. Interactions between Cooccurring Lactic  
366 Acid Bacteria in Honey Bee Hives. *Appl Environ Microbiol* 81:7261–7270.
- 367 20. Waters CM, Bassler BL. 2005. Quorum Sensing: Cell-to-Cell Communication in Bacteria.  
368 *Annu Rev Cell Dev Biol* 21:319–346.
- 369 21. Miller MB, Bassler BL. 2001. Quorum Sensing in bacteria. *Annu Rev Microbiol* 55:165–  
370 199.
- 371 22. Federle MJ, Bassler BL. 2003. Interspecies communication in bacteria. *J Clin Invest*  
372 112:1291–1299.
- 373 23. Hammer BK, Bassler BL. 2003. Quorum sensing controls biofilm formation in *Vibrio*  
374 *cholerae*. *Mol Microbiol* 50:101–114.
- 375 24. Pereira CS, Thompson JA, Xavier KB. 2013. AI-2-mediated signalling in bacteria. *FEMS*  
376 *Microbiol Rev* 37:156–181.
- 377 25. McNab R, Ford SK, El-sabaeny A, Barbieri B, Cook GS, Lamont RJ. 2003. LuxS-Based  
378 Signaling in Sfilm Formation with *Porphyromonas gingivalis*. *J Bacteriol* 185:274–284.
- 379 26. Rickard AH, Palmer RJ, Blehert DS, Campagna SR, Semmelhack MF, Eglund PG,  
380 Bassler BL, Kolenbrander PE. 2006. Autoinducer 2: A concentration-dependent signal for

- 381 mutualistic bacterial biofilm growth. *Mol Microbiol* 60:1446–1456.
- 382 27. Thompson JAA, Oliveira RAA, Djukovic A, Ubeda C, Xavier KBB. 2015. Manipulation  
383 of the Quorum Sensing Signal AI-2 Affects the Antibiotic-Treated Gut Microbiota. *Cell*  
384 *Rep* 10:1861–1871.
- 385 28. Nyholm S V., McFall-Ngai M. 2004. The winnowing: establishing the squid–vibrio  
386 symbiosis. *Nat Rev Microbiol* 2:632–642.
- 387 29. Enomoto S, Chari A, Clayton AL, Dale C. 2017. Quorum Sensing Attenuates Virulence in  
388 *Sodalis praecaptivus*. *Cell Host Microbe* 21:629–636.e5.
- 389 30. Rutherford K, Parkhill J, Crook J, Horsnell T, Rice P, Rajandream M a, Barrell B. 2000.  
390 *Artemis*: sequence visualization and annotation. *Bioinformatics* 16:944–945.
- 391 31. Edgar RC. 2004. MUSCLE: Multiple sequence alignment with high accuracy and high  
392 throughput. *Nucleic Acids Res* 32:1792–1797.
- 393 32. Stamatakis A. 2014. RAxML version 8: A tool for phylogenetic analysis and post-analysis  
394 of large phylogenies. *Bioinformatics* 30:1312–1313.
- 395 33. Tamura K, Stecher G, Peterson D, Filipinski A, Kumar S. 2013. MEGA6: Molecular  
396 Evolutionary Genetics Analysis Version 6.0. *Mol Biol Evol* 30:2725–2729.
- 397 34. Surette MG, Bassler BL. 1998. Quorum sensing in *Escherichia coli* and *Salmonella*  
398 *typhimurium*. *Proc Natl Acad Sci U S A* 95:7046–7050.
- 399 35. Long T, Tu KC, Wang Y, Mehta P, Ong NP, Bassler BL, Wingreen NS. 2009.  
400 Quantifying the Integration of Quorum-Sensing Signals with Single-Cell Resolution.

- 401 PLoS Biol 7:e68.
- 402 36. vanEngelsdorp D, Evans JD, Saegerman C, Mullin C, Haubruge E, Nguyen BK, Frazier  
403 M, Frazier J, Cox-Foster D, Chen Y, Underwood R, Tarpy DR, Pettis JS. 2009. Colony  
404 collapse disorder: A descriptive study. PLoS One 4.
- 405 37. Caporaso JG, Lauber CL, Walters WA, Berg-Lyons D, Huntley J, Fierer N, Owens SM,  
406 Betley J, Fraser L, Bauer M, Gormley N, Gilbert JA, Smith G, Knight R. 2012. Ultra-  
407 high-throughput microbial community analysis on the Illumina HiSeq and MiSeq  
408 platforms. *Isme J* 6:1621–1624.
- 409 38. Kozich JJ, Westcott SL, Baxter NT, Highlander SK, Schloss PD. 2013. Development of a  
410 dual-index sequencing strategy and curation pipeline for analyzing amplicon sequence  
411 data on the MiSeq Illumina sequencing platform. *Appl Env Microbiol* 2013/06/25.  
412 79:5112–5120.
- 413 39. Newton ILG, Roeselers G. 2012. The effect of training set on the classification of honey  
414 bee gut microbiota using the Naive Bayesian Classifier. *Bmc Microbiol* 12.
- 415 40. O’Toole GA. 2011. Microtiter Dish Biofilm Formation Assay. *J Vis Exp* 3–5.
- 416 41. Zhu J, Patel R, Pei D. 2004. Catalytic mechanism of S-ribosylhomocysteinase (LuxS):  
417 Stereochemical course and kinetic isotope effect of proton transfer reactions.  
418 *Biochemistry* 43:10166–10172.
- 419 42. Pei D, Zhu J. 2004. Mechanism of action of S-ribosylhomocysteinase (LuxS). *Curr Opin*  
420 *Chem Biol* 8:492–497.
- 421 43. Hilgers MT, Ludwig ML. 2001. Crystal structure of the quorum-sensing protein LuxS

- 422 reveals a catalytic metal site. *Proc Natl Acad Sci U S A* 98:11169–11174.
- 423 44. Williams P, Winzer K, Chan WC, Camara M. 2007. Look who’s talking: communication  
424 and quorum sensing in the bacterial world. *Philos Trans R Soc B Biol Sci* 362:1119–1134.
- 425 45. Vásquez A, Forsgren E, Fries I, Paxton RJ, Flaberg E, Szekely L, Olofsson TC. 2012.  
426 Symbionts as Major Modulators of Insect Health: Lactic Acid Bacteria and Honeybees.  
427 *PLoS One* 7:e33188.
- 428 46. Forsgren E, Olofsson TC, Vásquez A, Fries I. 2009. Novel lactic acid bacteria inhibiting  
429 *Paenibacillus* larvae in honey bee larvae. *Apidologie* 41:99–108.
- 430 47. Martinson VG, Moy J, Moran NA. 2012. Establishment of Characteristic Gut Bacteria  
431 during Development of the Honeybee Worker. *Appl Environ Microbiol* 78:2830–2840.
- 432 48. Martinson VG, Danforth BN, Minckley RL, Rueppell O, Tingek S, Moran NA. 2011. A  
433 simple and distinctive microbiota associated with honey bees and bumble bees. *Mol Ecol*  
434 20:619–628.
- 435 49. Borlee BR, Geske GD, Robinson CJ, Blackwell HE, Handelsman J. 2008. Quorum-  
436 sensing signals in the microbial community of the cabbage white butterfly larval midgut.  
437 *ISME J* 2:1101–11.
- 438 50. Davies DG, Parsek MR, Pearson JP, Iglewski BH, Costerton JW, Greenberg EP. 1998.  
439 The involvement of cell-to-cell signals in the development of a bacterial biofilm. *Science*  
440 280:295–298.
- 441 51. Smith RS, Iglewski BH. 2003. *P. aeruginosa* quorum-sensing systems and virulence. *Curr*  
442 *Opin Microbiol* 6:56–60.

- 443 52. Emery O, Schmidt K, Engel P. 2017. Immune system stimulation by the gut symbiont  
444 *Frischella perrara* in the honey bee (*Apis mellifera*). *Mol Ecol* 26:2576–2590.

445

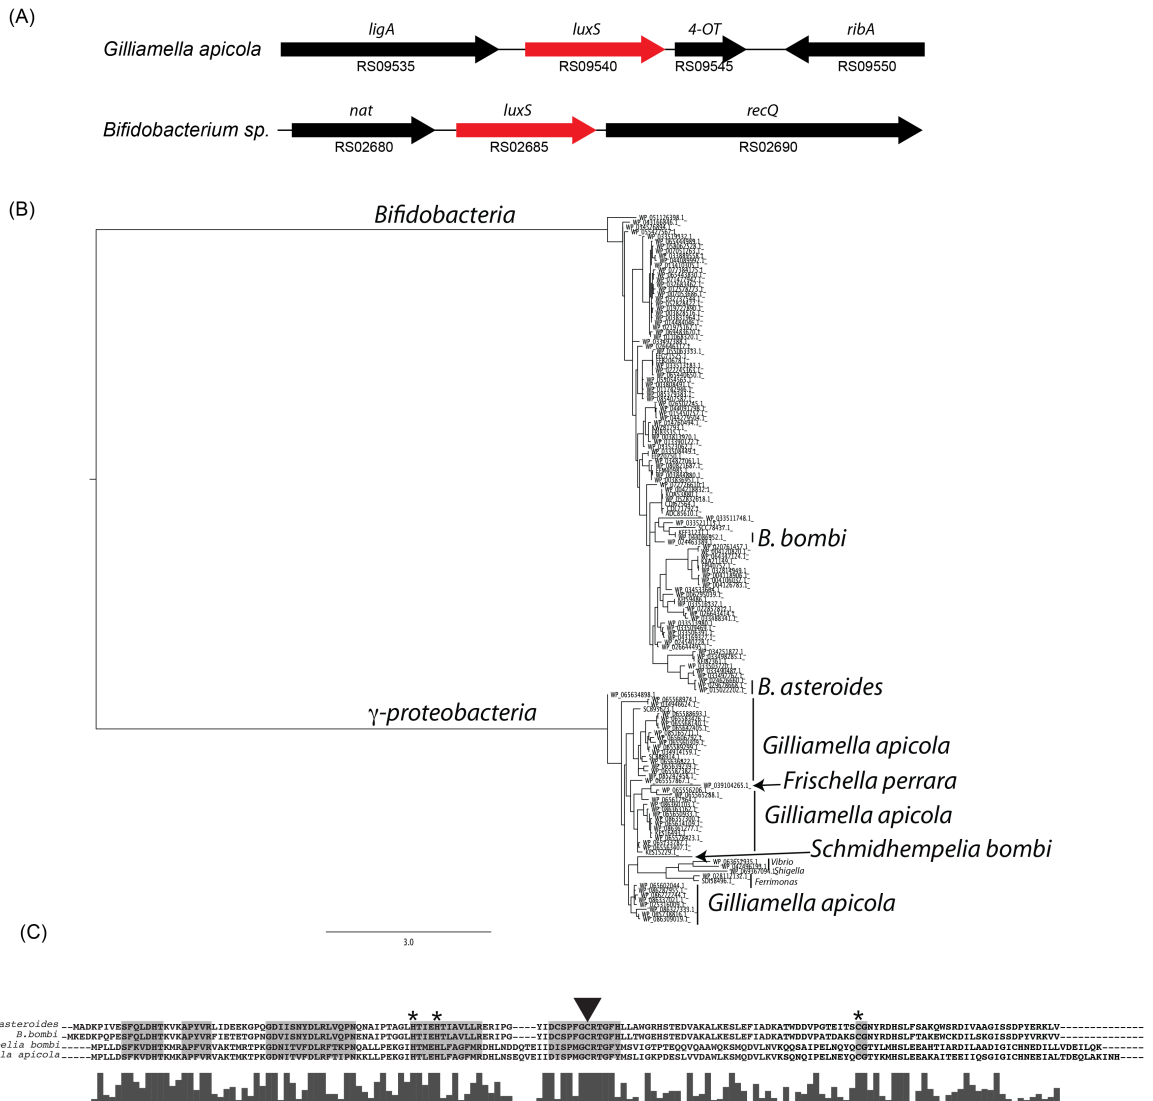

**Figure 1. Honey bee associated microbes encode LuxS.** (A) The *luxS* gene and its syntenic region is shown within the genomes of two honey bee specific isolates (*Gilliamella apicola* and *Bifidobacterium sp.*). (B) A phylogeny generated based on aligned LuxS amino acid sequences from honey bee and bumble bee associated microbes. (C) LuxS homologs from honey bee specific isolates (*Gilliamella apicola* and *Bifidobacterium asteroides*) and bumble bee isolates (*Schmidhempelia bombi* and *Bifidobacterium bombi*), were identified by functional gene annotation in an existing metagenomic dataset. Shaded areas represent highly conserved regions among these sequences as well as those of other published LuxS homologs (36, 38, 48). Asterisk = conserved iron binding sites; arrowhead = catalytic cysteine.

12

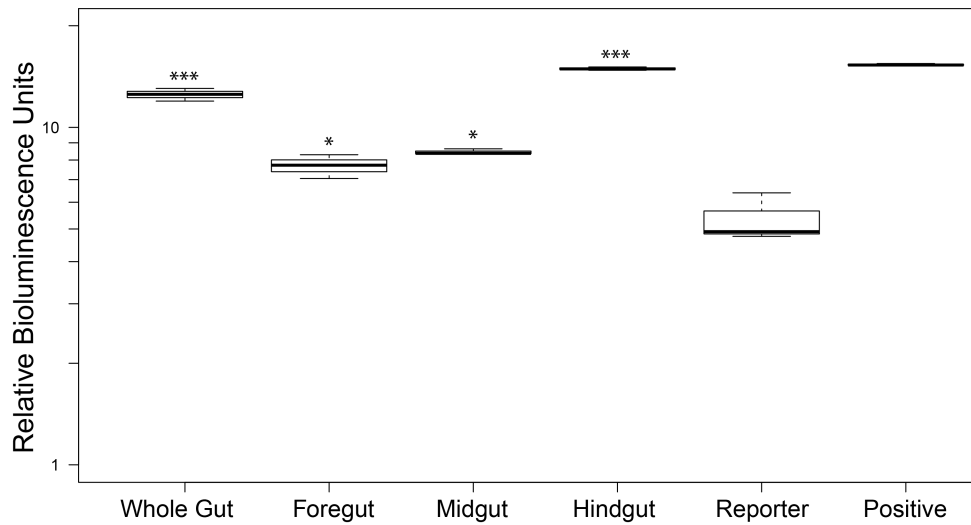

13

14 **Figure 2. Detection of autoinducer-2 in the honey bee gut.** After dissection, entire digestive tracts (Whole  
15 Gut) or gut sections (Foregut, Midgut, Hindgut) were homogenized and extracts were used in an  
16 autoinducer bioluminescence assay. The production of luminescence by *V. harveyi* TL26 is only observed  
17 in the presence of supernatants from the positive control (AI-2 producing *V. harveyi* strain BB120) or from  
18 extracts from the honey bee. Note log scale. Samples were compared to reporter alone with a t-test and  
19 significance designated by \*\*\* = 0.001, \*\* = 0.01, \* = 0.05.

20

21



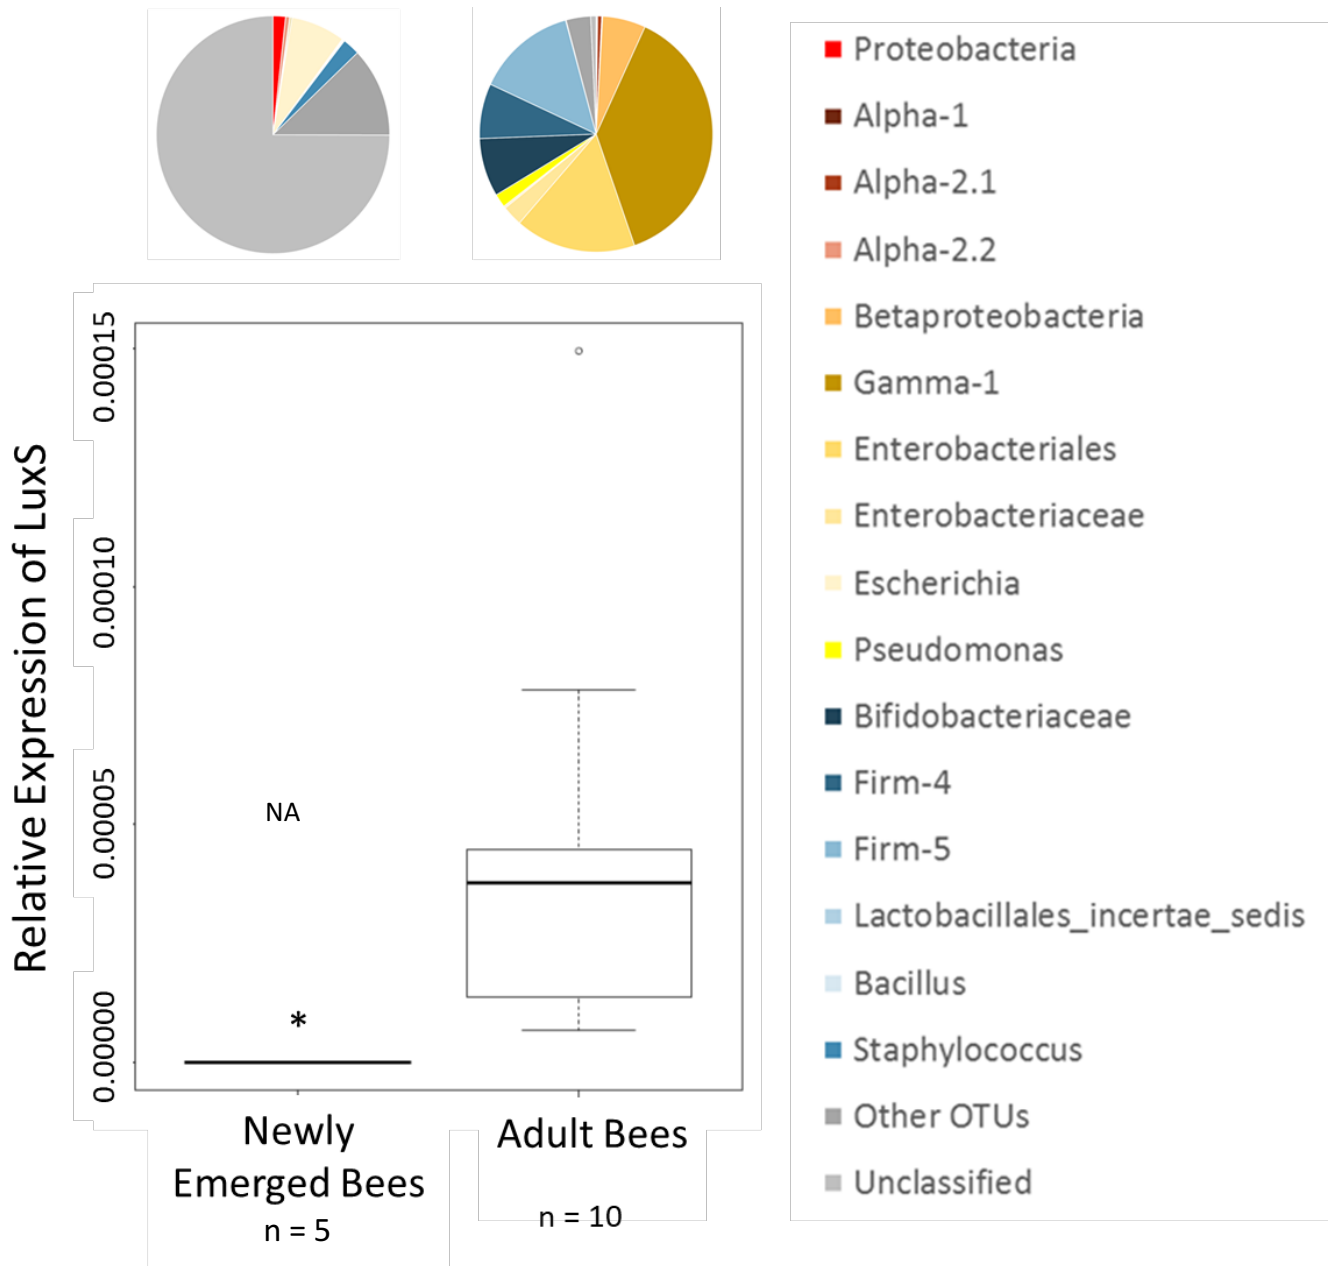

22 **Figure 3. *luxS* gene expression increases and bacterial community composition changes as adult bees**  
23 **mature.** Bacterial community composition, based on 16S rRNA, in newly emerged bees is dominated by  
24 unclassified bacterial taxa whereas adult bees have acquired the characteristic worker bee microbiome.  
25 Additionally, relative expression of *luxS* (qPCR) by *Gilliamella apicola* is detectable in mature adult bees  
26 while in newly emerged bees we observed no amplification of the transcript (NA = No Amplification).

27

28

29

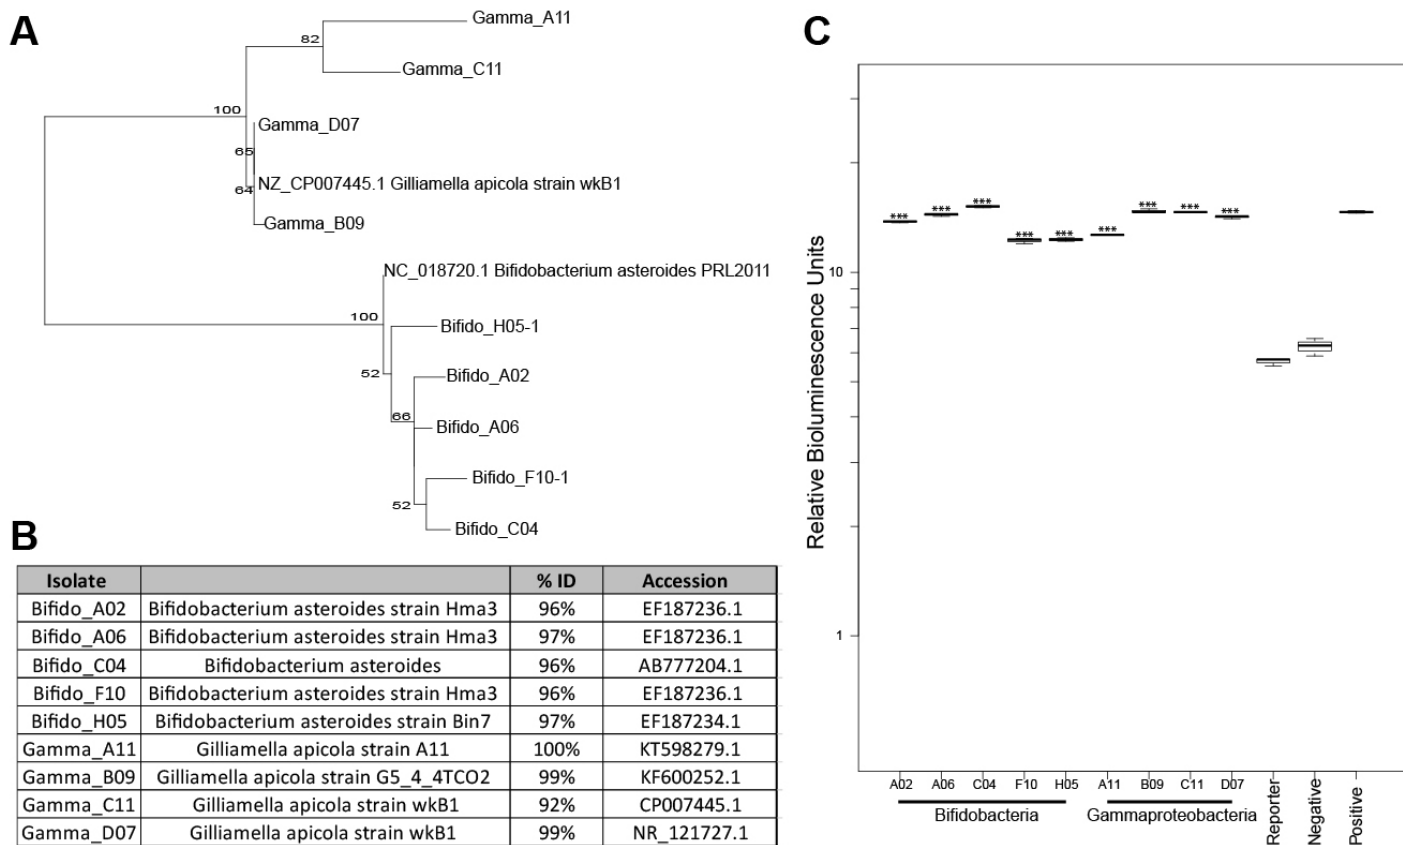

30

31 **Figure 4. *Gilliamella apicola* and *Bifidobacterium sp.* produce AI-2 *in vitro*.** (A) Phylogenetic tree of  
 32 bacterial isolates utilized in this study and their evolutionary placement in the context of other honey bee  
 33 gut microbes. 16S rRNA genes (> 400 bp) were used to construct this maximum likelihood phylogeny and  
 34 bootstrap values are from 1000 iterations (B) 16S rRNA gene sequences from cultured isolates are 92-100%  
 35 identical to known honey bee associated microbes. Percent identities of cultured isolates shown relative to  
 36 accessions in the NCBI's nr database. (C) Detection of AI-2 in the overnight culture supernatants of  
 37 *Gilliamella apicola* and *Bifidobacterium sp.* using *Vibrio harveyi* reporter strain luminescence. Controls  
 38 (negative: sterile BHI; positive: *V. harveyi* BB120) (Note log scale). Samples compared to the Reporter  
 39 only control with a t-test and significance designated by \*\*\* = < 0.001.

40

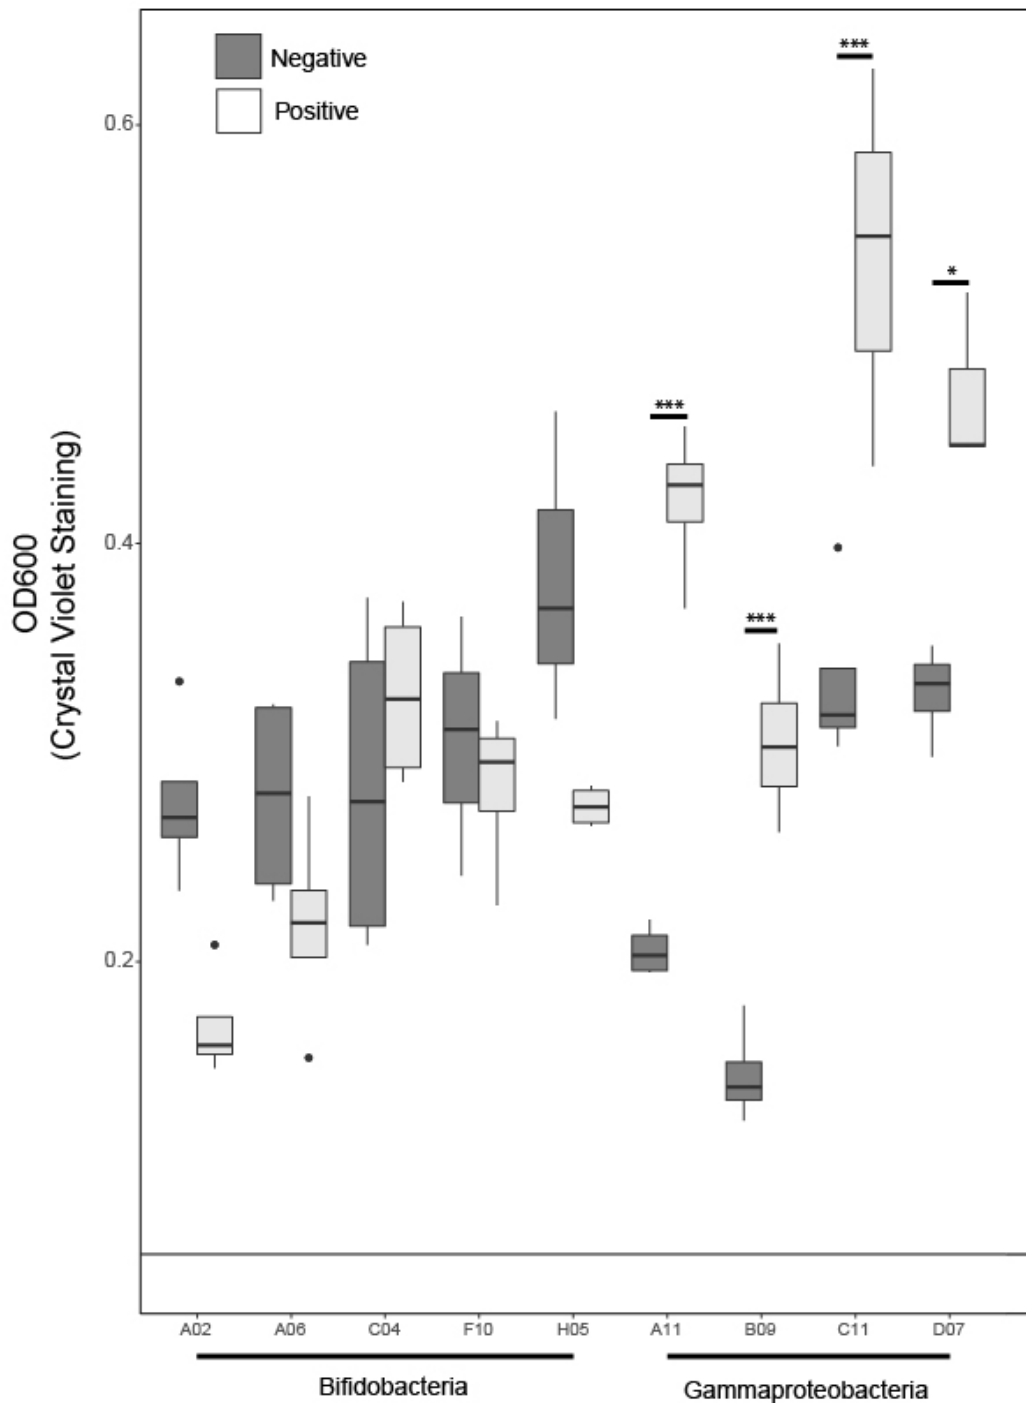

41  
42

43 **Figure 5. Quantification of crystal violet stained biofilms produced by honey bee gut microbiome**  
44 **members.** Biofilm production on a chitin substrate by honey bee associated microbes was quantified  
45 using a standard crystal violet assay. Cultures were incubated either without (dark grey) or with (light  
46 grey) purified AI-2 added (see methods). Black line across the graph represents the average absorbance  
47 from sterile media controls across treatments. Comparisons were made between isolates treated with AI-2  
48 and the same isolate without AI-2 added using t-tests. Significance designated by \*\*\* =  $p < 0.001$ , \* =  $p <$   
49  $0.05$ .
